# Supplementary material for: Assessment of Distribution of Potentially Toxic Elements in Different Environmental Media Impacted by a Former Chlor-Alkali Plant
Source: MDPI journal article supplement (doi:10.3390/su132413829), 2021-12-14
Supplement: s1 [file s1]

## **Supplementary Material**

### **Assessment of distribution of potentially toxic elements in different environmental media impacted by a former chlor-alkali plant**

Mert Guney<sup>1 \*</sup>, Zhanel Akimzhanova<sup>2</sup>, Aiganym Kumisbek<sup>3</sup>, Symbat Kismelyeva<sup>1</sup>, Almira  
Guney<sup>4</sup>, Ferhat Karaca<sup>1</sup>, Vassilis Inglezakis<sup>5</sup>

<sup>1</sup> Department of Civil and Environmental Engineering, School of Engineering and Digital Sciences, The Environment & Resource Efficiency Cluster (EREC), Nazarbayev University, Kabanbay Batyr Av. 53, Nur- Sultan 010000 Kazakhstan

<sup>2</sup> Environmental Engineering and Sustainability Management, École Polytechnique de Paris, Route de Saclay, Palaiseau Cedex 91128 France

<sup>3</sup> Faculty of Engineering, University of Debrecen, Otemeto St. 2-4, Debrecen 4028 Hungary

<sup>4</sup> Department of Chemical and Materials Engineering, School of Engineering and Digital Sciences, The Environment & Resource Efficiency Cluster (EREC), Nazarbayev University, Kabanbay Batyr Ave. 53, Nur- Sultan 010000 Kazakhstan

<sup>5</sup> Chemical and Process Engineering, University of Strathclyde, Glasgow G1 1XQ, United Kingdom

**Table S1.** Total concentrations of Hg (average [mg/kg]  $\pm$  relative standard deviation (RSD) [%]) in soils and sediments

| Fieldtrip: May 2018 |                 | Fieldtrip: September 2018 |                 | Fieldtrip: October 2018 |                 |
|---------------------|-----------------|---------------------------|-----------------|-------------------------|-----------------|
| ID                  | Hg              | ID                        | Hg              | ID                      | Hg              |
| 2505-P-S-01         | 0.09 $\pm$ 0.02 | 2509-P-S-01               | 0.04 $\pm$ 0.01 | 0810-P-S-01             | 0.01 $\pm$ 0.01 |
| 2505-P-S-02         | 0.01 $\pm$ 0.02 | 2509-P-S-02               | 0.01 $\pm$ 0.03 | 0810-P-S-02             | 0.00 $\pm$ 0.02 |
| 2505-P-S-03         | 7.0 $\pm$ 0.00  | 2509-P-S-03               | 0.01 $\pm$ 0.02 | 0810-P-S-03             | 0.01 $\pm$ 0.01 |
| 2505-P-S-04         | 4.3 $\pm$ 0.03  | 2509-P-S-04               | 0.01 $\pm$ 0.01 | 0810-P-S-04             | 0.01 $\pm$ 0.01 |
| 2505-P-S-05         | 1.6 $\pm$ 0.00  | 2509-P-S-05               | 0.01 $\pm$ 0.01 | 0810-P-S-05             | 0.02 $\pm$ 0.02 |
| 2505-P-S-06         | 4.7 $\pm$ 0.01  | 2509-P-S-06               | 0.01 $\pm$ 0.02 | 0810-P-S-06             | 0.04 $\pm$ 0.03 |
| 2505-P-S-07         | 0.00 $\pm$ 0.01 |                           |                 | 0810-P-S-07             | 0.03 $\pm$ 0.03 |
| 2505-P-S-08         | 0.02 $\pm$ 0.01 |                           |                 | 0810-P-S-08             | 0.08 $\pm$ 0.00 |
| 2505-P-S-09         | 0.01 $\pm$ 0.00 |                           |                 | 0810-P-S-09             | 0.13 $\pm$ 0.01 |
| 2505-P-S-10         | 0.03 $\pm$ 0.02 |                           |                 | 0810-P-S-10             | 0.02 $\pm$ 0.01 |
| 2505-P-S-11         | 0.00 $\pm$ 0.05 |                           |                 | 0810-P-S-11             | 0.00 $\pm$ 0.05 |
| 2505-P-S-12         | 0.00 $\pm$ 0.02 |                           |                 | 0810-P-S-12             | 1.2 $\pm$ 0.00  |
| 2505-P-S-13         | 0.00 $\pm$ 0.02 |                           |                 | 0810-P-S-13             | 0.02 $\pm$ 0.00 |
| 2505-P-Sed-01       | 0.03 $\pm$ 0.03 |                           |                 | 0810-P-S-14             | 0.02 $\pm$ 0.00 |
| 2505-P-Sed-02       | 0.01 $\pm$ 0.04 |                           |                 | 0810-P-S-15             | 0.00 $\pm$ 0.04 |
| 2505-P-Sed-03       | 0.85 $\pm$ 0.00 |                           |                 | 0810-P-S-16             | 0.00 $\pm$ 0.00 |
| 2505-P-Sed-04       | 5.1 $\pm$ 0.01  |                           |                 | 0810-P-S-17             | 0.00 $\pm$ 0.00 |
| 2505-P-Sed-05       | 1.9 $\pm$ 0.00  |                           |                 | 0810-P-S-18             | 0.03 $\pm$ 0.03 |
| 2505-P-Sed-06       | 4.3 $\pm$ 0.01  |                           |                 | 0810-P-S-19             | 0.01 $\pm$ 0.00 |
| 2505-P-Sed-07       | 0.02 $\pm$ 0.01 |                           |                 | 0810-P-S-20             | 0.01 $\pm$ 0.02 |
| 2505-P-Sed-08       | 0.00 $\pm$ 0.01 |                           |                 | 0810-P-S-21             | 0.02 $\pm$ 0.00 |
| 2505-P-Sed-09       | 0.12 $\pm$ 0.03 |                           |                 | 0810-P-S-22             | 0.00 $\pm$ 0.00 |
| 2505-P-Sed-10       | 0.02 $\pm$ 0.01 |                           |                 | 0810-P-Sed-01           | 0.01 $\pm$ 0.01 |
|                     |                 |                           |                 | 0810-P-Sed-02           | 0.33 $\pm$ 0.00 |
|                     |                 |                           |                 | 0910-P-Sed-03           | 0.45 $\pm$ 0.70 |
|                     |                 |                           |                 | 0910-P-Sed-04           | 24 $\pm$ 0.01   |
|                     |                 |                           |                 | 0910-P-Sed-05           | 0.04 $\pm$ 0.01 |
|                     |                 |                           |                 | 0910-P-Sed-06           | 0.07 $\pm$ 0.02 |
|                     |                 |                           |                 | 0910-P-Sed-07           | 0.10 $\pm$ 0.00 |
|                     |                 |                           |                 | 0910-P-Sed-08           | 0.06 $\pm$ 0.00 |

**Table S2.** Total concentration of Hg (average [mg/L]) and selected characteristics in soils and sediments

| Field trip | ID            | THg    | pH   | TC (g/kg) | TOC (g/kg) | TN    |
|------------|---------------|--------|------|-----------|------------|-------|
| Oct-18     | 0810-P-S-01   | 0.013  | 7.97 | -         | -          | -     |
|            | 0810-P-S-02   | 0.0016 | 7.86 | -         | -          | -     |
|            | 0810-P-S-03   | 0.014  | 8.31 | -         | -          | -     |
|            | 0810-P-S-04   | 0.012  | 8.26 | -         | -          | -     |
|            | 0810-P-S-05   | 0.021  | 8.05 | -         | -          | -     |
|            | 0810-P-S-06   | 0.036  | 8.43 | -         | -          | -     |
|            | 0810-P-S-07   | 0.028  | 8.08 | -         | -          | -     |
|            | 0810-P-S-08   | 0.077  | 8.40 | -         | -          | -     |
|            | 0810-P-S-09   | 0.13   | 7.63 | -         | -          | -     |
|            | 0810-P-S-10   | 0.017  | 7.92 | -         | -          | -     |
|            | 0810-P-S-11   | 0.0006 | 9.25 | -         | -          | -     |
|            | 0810-P-S-12   | 1.2    | 8.49 | -         | -          | -     |
|            | 0810-P-S-13   | 0.020  | 7.48 | -         | -          | -     |
|            | 0810-P-S-14   | 0.018  | 7.27 | -         | -          | -     |
|            | 0810-P-S-15   | 0.0007 | 8.33 | -         | -          | -     |
|            | 0810-P-S-16   | 0.0017 | 8.57 | -         | -          | -     |
|            | 0810-P-S-17   | 0.0017 | 8.13 | -         | -          | -     |
|            | 0810-P-S-18   | 0.033  | 7.74 | -         | -          | -     |
|            | 0810-P-S-19   | 0.011  | 7.53 | -         | -          | -     |
|            | 0810-P-S-20   | 0.0076 | 8.40 | -         | -          | -     |
|            | 0810-P-S-21   | 0.015  | 8.06 | -         | -          | -     |
|            | 0810-P-S-22   | 0.0014 | 8.00 | -         | -          | -     |
| May-18     | 2505-P-S-01   | 91     | 7.64 | -         | -          | -     |
|            | 2505-P-Sed-01 | 33     | 7.48 | -         | -          | -     |
|            | 2505-P-S-02   | 6.4    | 8.25 | 11.5      | 8.38       | 0.072 |
|            | 2505-P-Sed-02 | 13     | 8.70 | 7.72      | 4.57       | 0.064 |
|            | 2505-P-S-03   | 7,000  | 7.58 | -         | -          | -     |
|            | 2505-P-Sed-03 | 850    | 8.07 | -         | -          | -     |
|            | 2505-P-S-04   | 4,260  | 8.23 | 12.8      | 10.4       | 0.167 |
|            | 2505-P-Sed-04 | 5,100  | 8.08 | 11.1      | 6.53       | 0.114 |
|            | 2505-P-S-05   | 1,620  | 8.70 | -         | -          | -     |
|            | 2505-P-Sed-05 | 1,900  | 8.25 | -         | -          | -     |
|            | 2505-P-S-06   | 4,680  | 8.45 | 12.5      | 10.6       | 0.148 |
|            | 2505-P-Sed-06 | 4,280  | 8.48 | 11.0      | 10.8       | 0.167 |
|            | 2505-P-S-07   | 2.2    | 8.40 | -         | -          | -     |
|            | 2505-P-Sed-07 | 17     | 8.23 | -         | -          | -     |
|            | 2505-P-S-08   | 18     | 8.04 | -         | -          | -     |
|            | 2505-P-Sed-08 | 3.8    | 8.74 | 2.21      | 2.14       | 0.033 |
|            | 2505-P-S-09   | 9.3    | 8.29 | 3.13      | 2.32       | 0.042 |
|            | 2505-P-Sed-09 | 120    | 7.58 | -         | -          | -     |
|            | 2505-P-S-10   | 33     | 7.80 | -         | -          | -     |
|            | 2505-P-Sed-10 | 21     | 8.25 | -         | -          | -     |
|            | 2505-P-S-11   | 0.81   | 8.07 | -         | -          | -     |
|            | 2505-P-S-12   | 1.8    | 8.50 | -         | -          | -     |
|            | 2505-P-S-13   | 2.8    | 8.51 | -         | -          | -     |
| Sep-18     | 2509-P-S-01   | 0.0380 | 7.11 | -         | -          | -     |
|            | 2509-P-S-02   | 0.0050 | 7.47 | -         | -          | -     |
|            | 2509-P-S-03   | 0.0078 | 7.82 | -         | -          | -     |
|            | 2509-P-S-04   | 0.012  | 7.77 | -         | -          | -     |
|            | 2509-P-S-05   | 0.0085 | 7.94 | -         | -          | -     |
|            | 2509-P-S-06   | 0.011  | 8.08 | -         | -          | -     |

**Table S3.** Total concentration of Hg (average [mg/L]) and selected characteristics in groundwater

| Field trip | Sample | Sample ID    | Hg (mg/L) | pH    | Conductivity (mS/cm) |
|------------|--------|--------------|-----------|-------|----------------------|
| May-18     | 1      | 2205-P-GW-01 | 1.70E-05  | 8.74  | 4.74                 |
|            | 5      | 2205-P-GW-02 | 2.80E-05  | -     | 7.47                 |
|            | 6      | 2205-P-GW-03 | 8.00E-06  | -     | 5.12                 |
|            | 8      | 2205-P-GW-04 | 1.50E-05  | -     | 7.72                 |
|            | 9      | 2205-P-GW-05 | 6.50E-06  | -     | 8.10                 |
|            | 10     | 2205-P-GW-06 | 1.50E-05  | -     | 10.6                 |
|            | 11     | 2205-P-GW-07 | 1.20E-05  | -     | 6.00                 |
|            | 12     | 2205-P-GW-08 | 6.00E-06  | -     | 8.67                 |
|            | 13     | 2205-P-GW-09 | 6.00E-06  | -     | 8.57                 |
|            | 14     | 2205-P-GW-10 | 2.30E-05  | -     | 2.64                 |
|            | 15     | 2305-P-GW-11 | 5.50E-06  | -     | 14.1                 |
|            | 16     | 2305-P-GW-12 | 6.50E-06  | -     | 7.28                 |
|            | 17     | 2305-P-GW-13 | 9.00E-06  | -     | 4.37                 |
|            | 18     | 2305-P-GW-14 | 7.00E-06  | -     | 1.81                 |
|            | 20     | 2305-P-GW-15 | 7.50E-06  | -     | 1.32                 |
|            | 21     | 2305-P-GW-16 | 7.00E-06  | -     | 43.4                 |
|            | 22     | 2305-P-GW-17 | 8.00E-06  | -     | 2.03                 |
|            | 23     | 2305-P-GW-18 | 9.00E-06  | -     | 2.11                 |
|            | 24     | 2305-P-GW-19 | 5.00E-06  | 9.86  | -                    |
|            | 25     | 2305-P-GW-20 | 1.10E-05  | 8.85  | -                    |
|            | 28     | 2305-P-GW-22 | 7.30E-06  | 8.62  | -                    |
| Oct-18     | 24     | 0910-P-GW-02 | 4.70E-02  | -     | -                    |
|            | 25     | 0910-P-GW-03 | 6.00E-02  | -     | -                    |
|            | 26     | 0910-P-GW-04 | 2.00E-01  | -     | -                    |
|            | 30     | 0910-P-GW-05 | 9.10E-01  | -     | -                    |
|            | 31     | 0910-P-GW-06 | 1.70E-01  | -     | -                    |
|            | 32     | 0910-P-GW-07 | 9.90E-02  | -     | -                    |
|            | 34     | 0910-P-GW-09 | 1.40E-01  | -     | -                    |
|            | 35     | 0910-P-GW-10 | 3.60E-01  | -     | -                    |
|            | 36     | 0910-P-GW-11 | 1.30E+00  | -     | -                    |
|            | 39     | 0910-P-GW-14 | 9.20E-01  | -     | -                    |
|            | 45     | 0910-P-GW-16 | 2.60E-01  | -     | -                    |
|            | 49     | 0910-P-GW-18 | 6.70E-03  | -     | -                    |
|            | 60     | 0910-P-GW-20 | 3.40E-02  | -     | -                    |
|            | 62     | 0910-P-GW-22 | 4.90E-01  | -     | -                    |
|            | 86     | 0910-P-GW-23 | 7.00E-06  | -     | -                    |
| Jul-19     | 1      | 2307-P-GW-01 | 8.00E-04  | 9.49  | -                    |
|            | 3      | 2307-P-GW-02 | 2.60E-04  | 8.75  | -                    |
|            | 4      | 2307-P-GW-03 | 2.10E-04  | 7.23  | -                    |
|            | 5      | 2307-P-GW-04 | 1.40E-04  | 9.50  | -                    |
|            | 6      | 2307-P-GW-05 | 2.20E-05  | 4.68  | -                    |
|            | 9      | 2307-P-GW-06 | 1.20E-05  | 10.35 | -                    |
|            | 11     | 2307-P-GW-07 | 2.40E-04  | 9.12  | -                    |
|            | 12     | 2307-P-GW-08 | 9.00E-05  | 9.15  | -                    |
|            | 13     | 2307-P-GW-09 | 1.30E-05  | 9.94  | -                    |

|    |              |          |      |   |
|----|--------------|----------|------|---|
| 17 | 2307-P-GW-10 | 3.00E-05 | 7.89 | - |
| 18 | 2307-P-GW-11 | 2.00E-05 | 8.03 | - |
| 20 | 2307-P-GW-12 | 3.10E-05 | 9.84 | - |
| 32 | 2407-P-GW-13 | 1.10E-05 | 9.38 | - |
| 35 | 2407-P-GW-14 | 1.40E-05 | 8.99 | - |
| 36 | 2407-P-GW-15 | 7.00E-06 | 9.04 | - |
| 40 | 2407-P-GW-16 | 7.00E-06 | 8.85 | - |
| 41 | 2407-P-GW-17 | 4.00E-06 | 9.66 | - |
| 42 | 2407-P-GW-18 | 1.70E-05 | 7.70 | - |

---

**Table S4.** Total concentration of Hg (average [mg/kg]) and selected characteristics in surface waters

| Field trip | Sample   | Sample ID     | Hg (mg/L) | pH   | Conductivity (mS/cm) |
|------------|----------|---------------|-----------|------|----------------------|
| May-18     | 2        | 2205-P-LW-01  | 1.40E-05  | -    | 12.0                 |
|            | 3        | 2205-P-LW-02  | 6.00E-06  | -    | 18.6                 |
|            | 4        | 2205-P-LW-03  | 1.30E-05  | -    | 19.1                 |
|            | 7        | 2205-P-LW-04  | 1.50E-05  | -    | 18.8                 |
|            | 19       | 2305-P-LW-05  | 2.60E-05  | -    | 5.46                 |
|            | N/A (69) | 2605-P-Cdr-01 | 5.50E-06  | 8.65 | -                    |
| Oct-18     | 22       | 0910-P-LW-01  | 3.60E-01  | -    | -                    |
|            | 41       | 0910-P-LW-03  | 1.30E-02  | -    | -                    |
|            | 53       | 0910-P-RW-04  | 7.20E-01  | -    | -                    |
|            | 56       | 0910-P-LW-05  | 1.30E-02  | -    | -                    |
|            | 63       | 0910-P-LW-06  | 1.40E-02  | -    | -                    |
|            | 13       | 0810-P-Wc-02  | 5.50E-04  | -    | -                    |
| Jul-19     | 7        | 2307-P-LW-01  | 1.30E-04  | 8.56 | -                    |
|            | 8        | 2307-P-LW-02  | 2.30E-05  | 7.59 | -                    |
|            | 10       | 2307-P-LW-03  | 6.50E-03  | 7.25 | -                    |
|            | 14       | 2307-P-LW-04  | 5.00E-04  | 8.65 | -                    |
|            | 15       | 2307-P-LW-05  | 3.20E-04  | 8.44 | -                    |
|            | 19       | 2307-P-LW-06  | 2.10E-04  | 8.73 | -                    |
|            | 21       | 2307-P-LW-07  | 3.50E-05  | 7.37 | -                    |
|            | 22       | 2307-P-LW-08  | 5.00E-05  | 8.26 | -                    |
|            | 33       | 2407-P-LW-14  | 5.00E-06  | 8.21 | -                    |
|            | 34       | 2407-P-LW-15  | 6.00E-06  | 8.39 | -                    |
|            | 24       | 2307-P-LW-09  | 1.40E-05  | 8.62 | -                    |
|            | 26       | 2307-P-LW-10  | 8.00E-06  | 8.63 | -                    |
|            | 28       | 2407-P-LW-11  | 9.00E-06  | 6.40 | -                    |
|            | 29       | 2407-P-LW-12  | 9.00E-06  | 7.34 | -                    |
|            | 31       | 2407-P-LW-13  | 9.00E-06  | 6.44 | -                    |
|            | 37       | 2407-P-LW-16  | 1.40E-05  | 5.89 | -                    |
|            | 38       | 2407-P-LW-17  | 6.00E-06  | 6.14 | -                    |
|            | 39       | 2407-P-LW-18  | 9.00E-06  | 6.37 | -                    |
|            | 43       | 2407-P-LW-19  | 4.90E-05  | 8.53 | -                    |
|            | 44       | 2407-P-LW-20  | 3.20E-05  | 8.67 | -                    |
|            | 45       | 2407-P-LW-21  | 4.50E-05  | 8.36 | -                    |
|            | 46       | 2407-P-LW-22  | 4.60E-05  | 8.49 | -                    |
|            | 47       | 2407-P-LW-23  | 8.20E-05  | 8.43 | -                    |
|            | 48       | 2407-P-LW-24  | 3.40E-04  | 8.44 | -                    |
|            | 51       | 2407-P-Cdr-01 | 6.00E-06  | 7.83 | -                    |
|            | 49       | 2407-P-RW-01  | 4.00E-06  | 8.38 | -                    |
|            | 50       | 2407-P-RW-02  | 3.00E-06  | 8.30 | -                    |
|            | 52       | 2407-P-RW-03  | 4.00E-06  | 7.94 | -                    |
|            | 53       | 2407-P-RW-04  | 4.00E-06  | 8.55 | -                    |
|            | 54       | 2407-P-RW-05  | 4.00E-06  | 7.96 | -                    |
|            | 55       | 2407-P-RW-06  | 4.00E-06  | 8.11 | -                    |
|            | 56       | 2407-P-RW-07  | 4.00E-06  | 8.49 | -                    |

**Table S5.** Total concentrations of selected PTEs (average [mg/kg]  $\pm$  RSD [%]) in soils

| Field trip | Sample ID | As           | Ba            | Cd             | Co           | Cr            | Cu            | Mn             | Ni          | Pb           | Sb    | Se     | Zn           |
|------------|-----------|--------------|---------------|----------------|--------------|---------------|---------------|----------------|-------------|--------------|-------|--------|--------------|
| Jul-19     | 7 (1 m)   | 26 $\pm$ 11  | 180 $\pm$ 3   | < 0.0012       | 17 $\pm$ 9   | 76 $\pm$ 14   | 32 $\pm$ 8    | 550 $\pm$ 8    | 42 $\pm$ 11 | 19 $\pm$ 2   | < 1.1 | < 0.60 | < 1.5        |
|            | 7 (10 m)  | < 0.22       | 390 $\pm$ 4   | < 0.0012       | 16 $\pm$ 5   | 120 $\pm$ 3   | 39 $\pm$ 2    | 520 $\pm$ 3    | 51 $\pm$ 3  | 26 $\pm$ 5   | < 1.1 | < 0.60 | < 1.5        |
|            | 8 (1 m)   | 32 $\pm$ 0.2 | 430 $\pm$ 8   | 0.53 $\pm$ 25  | 34 $\pm$ 1   | 120 $\pm$ 3   | 49 $\pm$ 8    | 8,170 $\pm$ 5  | 83 $\pm$ 4  | 38 $\pm$ 4   | < 1.1 | < 0.60 | < 1.5        |
|            | 9         | 26 $\pm$ 13  | 410 $\pm$ 8   | 0.60 $\pm$ 2   | 25 $\pm$ 3   | 120 $\pm$ 12  | 78 $\pm$ 69   | 1,220 $\pm$ 4  | 72 $\pm$ 3  | 30 $\pm$ 11  | < 1.1 | < 0.60 | < 1.5        |
|            | 10 (1 m)  | 27 $\pm$ 1   | 310 $\pm$ 1   | < 0.0012       | 21 $\pm$ 33  | 100 $\pm$ 5   | 35 $\pm$ 9    | 540 $\pm$ 15   | 58 $\pm$ 31 | 23 $\pm$ 7   | < 1.1 | < 0.60 | < 1.5        |
|            | 10 (10 m) | 30 $\pm$ 3   | 380 $\pm$ 4   | < 0.0012       | 13 $\pm$ 3   | 110 $\pm$ 2   | 37 $\pm$ 7    | 580 $\pm$ 2    | 41 $\pm$ 13 | 25 $\pm$ 2   | < 1.1 | < 0.60 | < 1.5        |
|            | 12        | 31 $\pm$ 22  | 420 $\pm$ 10  | < 0.0012       | 24 $\pm$ 11  | 110 $\pm$ 12  | 41 $\pm$ 17   | 1,540 $\pm$ 16 | 69 $\pm$ 16 | 31 $\pm$ 21  | < 1.1 | < 0.60 | < 1.5        |
|            | 13        | < 0.22       | 230 $\pm$ 0.1 | < 0.0012       | 20 $\pm$ 1   | 84 $\pm$ 7    | 24 $\pm$ 5    | 820 $\pm$ 2    | 48 $\pm$ 6  | 20 $\pm$ 0.4 | < 1.1 | < 0.60 | < 1.5        |
|            | 14 (1 m)  | 28 $\pm$ 9   | 160 $\pm$ 15  | 0.21 $\pm$ 23  | 19 $\pm$ 53  | < 0.62        | 25 $\pm$ 35   | 340 $\pm$ 4    | 34 $\pm$ 6  | 13 $\pm$ 12  | < 1.1 | < 0.60 | < 1.5        |
|            | 14 (10 m) | 28 $\pm$ 9   | 270 $\pm$ 15  | 0.25 $\pm$ 42  | 12 $\pm$ 0.4 | 84 $\pm$ 10   | 30 $\pm$ 2    | 560 $\pm$ 5    | 41 $\pm$ 1  | 22 $\pm$ 11  | < 1.1 | < 0.60 | < 1.5        |
|            | 15 (1 m)  | 37 $\pm$ 2   | 150 $\pm$ 9   | < 0.0012       | 11 $\pm$ 4   | < 0.62        | 15 $\pm$ 19   | 430 $\pm$ 10   | 30 $\pm$ 31 | 12 $\pm$ 3   | < 1.1 | < 0.60 | < 1.5        |
|            | 15 (10 m) | < 0.22       | 180 $\pm$ 14  | < 0.0012       | 18 $\pm$ 20  | 90 $\pm$ 14   | 280 $\pm$ 129 | 400 $\pm$ 113  | < 0.10      | 92 $\pm$ 116 | < 1.1 | < 0.60 | < 1.5        |
|            | 16        | < 0.22       | 360 $\pm$ 1   | 0.32 $\pm$ 0.1 | 23 $\pm$ 10  | 110 $\pm$ 3   | 1,1 $\pm$ 1   | 92 $\pm$ 2     | < 0.10      | 250 $\pm$ 12 | < 1.1 | < 0.60 | < 1.5        |
|            | 17        | < 0.22       | 340 $\pm$ 10  | 0.29 $\pm$ 2   | 19 $\pm$ 1   | 96 $\pm$ 1    | 1,1 $\pm$ 7   | 98 $\pm$ 2     | < 0.10      | 190 $\pm$ 16 | < 1.1 | < 0.60 | < 1.5        |
|            | 18        | < 0.22       | 360 $\pm$ 9   | 0.42 $\pm$ 8   | 57 $\pm$ 59  | 140 $\pm$ 30  | 1,390 $\pm$ 6 | 140 $\pm$ 21   | < 0.10      | 280 $\pm$ 9  | < 1.1 | < 0.60 | < 1.5        |
|            | 19 (1 m)  | < 0.22       | 200 $\pm$ 7   | < 0.0012       | 16 $\pm$ 6   | 90 $\pm$ 12   | 24 $\pm$ 23   | 780 $\pm$ 10   | 41 $\pm$ 10 | 18 $\pm$ 4   | < 1.1 | < 0.60 | < 1.5        |
|            | 19 (10 m) | < 0.22       | 400 $\pm$ 52  | < 0.0012       | 17 $\pm$ 12  | 100 $\pm$ 17  | 22 $\pm$ 6    | 620 $\pm$ 10   | 42 $\pm$ 17 | 18 $\pm$ 10  | < 1.1 | < 0.60 | < 1.5        |
|            | 20        | < 0.22       | 450 $\pm$ 4   | 0.59 $\pm$ 29  | 25 $\pm$ 5   | 150 $\pm$ 0.4 | 49 $\pm$ 1    | 1,370 $\pm$ 4  | 73 $\pm$ 4  | 42 $\pm$ 1   | < 1.1 | < 0.60 | < 1.5        |
|            | 21 (1 m)  | < 0.22       | 140 $\pm$ 0.1 | < 0.0012       | 11 $\pm$ 15  | < 0.62        | 17 $\pm$ 8    | 930 $\pm$ 18   | 30 $\pm$ 17 | 16 $\pm$ 10  | < 1.1 | < 0.60 | < 1.5        |
|            | 21 (10 m) | < 0.22       | 320 $\pm$ 12  | 0.32 $\pm$ 32  | 20 $\pm$ 6   | 110 $\pm$ 3   | 34 $\pm$ 7    | 660 $\pm$ 8    | 48 $\pm$ 2  | 25 $\pm$ 4   | < 1.1 | < 0.60 | < 1.5        |
|            | 22 (1 m)  | 27 $\pm$ 3   | 390 $\pm$ 13  | < 0.0012       | 22 $\pm$ 2   | 100 $\pm$ 16  | 39 $\pm$ 15   | 900 $\pm$ 6    | 59 $\pm$ 5  | 24 $\pm$ 13  | < 1.1 | < 0.60 | < 1.5        |
|            | 22 (10 m) | 27 $\pm$ 3   | 380 $\pm$ 3   | 0.23 $\pm$ 28  | 21 $\pm$ 3   | 100 $\pm$ 3   | 41 $\pm$ 7    | 1,090 $\pm$ 3  | 61 $\pm$ 3  | 33 $\pm$ 9   | < 1.1 | < 0.60 | 220 $\pm$ 12 |
|            | 23        | 28 $\pm$ 3   | 510 $\pm$ 4   | 0.47 $\pm$ 33  | 29 $\pm$ 11  | 130 $\pm$ 1   | 45 $\pm$ 6    | 1,480 $\pm$ 1  | 72 $\pm$ 3  | 31 $\pm$ 2   | < 1.1 | < 0.60 | < 1.5        |
|            | 24 (1 m)  | < 0.22       | 370 $\pm$ 7   | 0.29 $\pm$ 54  | 21 $\pm$ 10  | 100 $\pm$ 3   | 37 $\pm$ 11   | 1,320 $\pm$ 8  | 55 $\pm$ 12 | 29 $\pm$ 4   | < 1.1 | < 0.60 | < 1.5        |
|            | 24 (10 m) | < 0.22       | 280 $\pm$ 1   | < 0.0012       | 22 $\pm$ 1   | 90 $\pm$ 6    | 40 $\pm$ 6    | 1,110 $\pm$ 4  | 61 $\pm$ 2  | 25 $\pm$ 2   | < 1.1 | < 0.60 | < 1.5        |
|            | 25        | < 0.22       | 280 $\pm$ 6   | < 0.0012       | 22 $\pm$ 30  | 83 $\pm$ 13   | 34 $\pm$ 7    | 1,030 $\pm$ 5  | 52 $\pm$ 2  | 26 $\pm$ 17  | < 1.1 | < 0.60 | < 1.5        |
|            | 26 (1 m)  | < 0.22       | 330 $\pm$ 11  | 0.80 $\pm$ 80  | 21 $\pm$ 20  | 120 $\pm$ 4   | 48 $\pm$ 4    | 1,520 $\pm$ 11 | 56 $\pm$ 13 | 38 $\pm$ 6   | < 1.1 | < 0.60 | 170 $\pm$ 10 |
|            | 26 (10 m) | 25 $\pm$ 0.3 | 330 $\pm$ 8   | 0.34 $\pm$ 54  | 26 $\pm$ 1   | 110 $\pm$ 0.2 | 45 $\pm$ 4    | 1,550 $\pm$ 2  | 67 $\pm$ 6  | 29 $\pm$ 2   | < 1.1 | < 0.60 | < 1.5        |
|            | 27        | < 0.22       | 220 $\pm$ 5   | < 0.0012       | 17 $\pm$ 7   | 74 $\pm$ 9    | 31 $\pm$ 6    | 830 $\pm$ 5    | 49 $\pm$ 11 | 20 $\pm$ 0.3 | < 1.1 | < 0.60 | < 1.5        |
|            | 28 (1 m)  | < 0.22       | 250 $\pm$ 5   | < 0.0012       | 14 $\pm$ 11  | 96 $\pm$ 4    | 34 $\pm$ 2    | 510 $\pm$ 7    | 50 $\pm$ 7  | 22 $\pm$ 7   | < 1.1 | < 0.60 | < 1.5        |
|            | 28 (10 m) | < 0.22       | 190 $\pm$ 8   | < 0.0012       | 18 $\pm$ 4   | 76 $\pm$ 19   | 35 $\pm$ 11   | 360 $\pm$ 4    | 50 $\pm$ 5  | 19 $\pm$ 12  | < 1.1 | < 0.60 | < 1.5        |
|            | 29 (1 m)  | < 0.22       | 220 $\pm$ 0.4 | < 0.0012       | 17 $\pm$ 8   | 100 $\pm$ 8   | 37 $\pm$ 2    | 450 $\pm$ 1    | 67 $\pm$ 29 | 20 $\pm$ 3   | < 1.1 | < 0.60 | 230 $\pm$ 15 |
|            | 29 (10 m) | < 0.22       | 120 $\pm$ 14  | < 0.0012       | 29 $\pm$ 96  | 74 $\pm$ 21   | 19 $\pm$ 9    | 310 $\pm$ 23   | 39 $\pm$ 41 | 12 $\pm$ 3   | < 1.1 | < 0.60 | < 1.5        |
|            | 30        | 24 $\pm$ 5   | 230 $\pm$ 5   | 0.31 $\pm$ 10  | 20 $\pm$ 0.3 | 87 $\pm$ 4    | 34 $\pm$ 6    | 890 $\pm$ 2    | 63 $\pm$ 3  | 23 $\pm$ 1   | < 1.1 | < 0.60 | < 1.5        |
|            | 31 (1 m)  | 23 $\pm$ 9   | 300 $\pm$ 5   | 0.18 $\pm$ 0.2 | 25 $\pm$ 2   | 100 $\pm$ 1   | 44 $\pm$ 3    | 700 $\pm$ 1    | 75 $\pm$ 5  | 25 $\pm$ 1   | < 1.1 | < 0.60 | < 1.5        |

|  |           |         |          |           |          |          |           |             |          |          |       |        |          |
|--|-----------|---------|----------|-----------|----------|----------|-----------|-------------|----------|----------|-------|--------|----------|
|  | 31 (10 m) | 24 ± 7  | 240 ± 2  | 0.22 ± 26 | 19 ± 4   | 84 ± 3   | 35 ± 1    | 1,120 ± 0.1 | 59 ± 6   | 22 ± 1   | < 1.1 | < 0.60 | < 1.5    |
|  | 32        | 30 ± 6  | 380 ± 25 | 0.24 ± 10 | 42 ± 23  | 150 ± 22 | 63 ± 20   | 1,180 ± 19  | 110 ± 28 | 43 ± 11  | < 1.1 | < 0.60 | 260 ± 24 |
|  | 33 (1 m)  | < 0.22  | 170 ± 14 | < 0.0012  | 27 ± 84  | < 0.62   | 29 ± 8    | 310 ± 12    | 46 ± 41  | 19 ± 0.3 | < 1.1 | < 0.60 | < 1.5    |
|  | 33 (10 m) | < 0.22  | 310 ± 14 | < 0.0012  | 22 ± 9   | < 0.62   | 43 ± 11   | 650 ± 14    | 61 ± 14  | 27 ± 9   | < 1.1 | < 0.60 | < 1.5    |
|  | 34 (1 m)  | < 0.22  | 230 ± 10 | < 0.0012  | 20 ± 21  | < 0.62   | 32 ± 18   | 1,060 ± 15  | 48 ± 25  | 21 ± 12  | < 1.1 | < 0.60 | < 1.5    |
|  | 34 (10 m) | < 0.22  | 250 ± 5  | 0.37 ± 68 | 20 ± 7   | < 0.62   | 37 ± 0.2  | 430 ± 1     | 61 ± 2   | 24 ± 4   | < 1.1 | < 0.60 | < 1.5    |
|  | 35        | 32 ± 1  | 360 ± 16 | 0.43 ± 39 | 29 ± 2   | 79 ± 10  | 59 ± 6    | 1,040 ± 3   | 93 ± 11  | 46 ± 12  | < 1.1 | < 0.60 | 220 ± 2  |
|  | 37 (1 m)  | < 0.22  | 330 ± 13 | 0.22 ± 25 | 28 ± 24  | 72 ± 9   | 45 ± 7    | 520 ± 6     | 77 ± 8   | 31 ± 2   | < 1.1 | < 0.60 | < 1.5    |
|  | 37 (10 m) | < 0.22  | 220 ± 1  | < 0.0012  | 16 ± 28  | < 0.62   | 35 ± 13   | 380 ± 2     | 47 ± 10  | 23 ± 2   | < 1.1 | < 0.60 | < 1.5    |
|  | 38 (1 m)  | < 0.22  | 150 ± 9  | 0.17 ± 17 | 15 ± 5   | < 0.62   | 25 ± 9    | 650 ± 8     | 35 ± 14  | 18 ± 16  | < 1.1 | < 0.60 | < 1.5    |
|  | 38 (10 m) | < 0.22  | 180 ± 6  | 0.16 ± 18 | 18 ± 3   | < 0.62   | 32 ± 8    | 460 ± 1     | 41 ± 4   | 20 ± 6   | < 1.1 | < 0.60 | < 1.5    |
|  | 39 (1 m)  | < 0.22  | 86 ± 10  | 0.47 ± 19 | 11 ± 23  | < 0.62   | 20 ± 16   | 500 ± 22    | 26 ± 27  | 17 ± 14  | < 1.1 | < 0.60 | < 1.5    |
|  | 39 (10 m) | < 0.22  | 200 ± 18 | < 0.0012  | 13 ± 6   | < 0.62   | 38 ± 3    | 370 ± 9     | 45 ± 16  | 22 ± 9   | < 1.1 | < 0.60 | < 1.5    |
|  | 40        | < 0.22  | 250 ± 8  | 0.34 ± 31 | 19 ± 11  | < 0.62   | 310 ± 123 | 920 ± 7     | 48 ± 4   | 37 ± 51  | < 1.1 | < 0.60 | < 1.5    |
|  | 41        | < 0.22  | 270 ± 3  | 0.49 ± 10 | 20 ± 16  | < 0.62   | 39 ± 4    | 970 ± 1     | 50 ± 2   | 25 ± 0.3 | < 1.1 | < 0.60 | < 1.5    |
|  | 42        | < 0.22  | 540 ± 14 | 0.42 ± 26 | 38 ± 15  | 140 ± 40 | 72 ± 18   | 1,800 ± 15  | 120 ± 16 | 46 ± 12  | < 1.1 | < 0.60 | 180 ± 7  |
|  | 43 (1 m)  | < 0.22  | 77 ± 3   | < 0.0012  | 10 ± 11  | < 0.62   | 19 ± 16   | 320 ± 15    | 29 ± 13  | 14 ± 12  | < 1.1 | < 0.60 | < 1.5    |
|  | 43 (10 m) | < 0.22  | 140 ± 1  | < 0.0012  | 16 ± 8   | < 0.62   | 26 ± 7    | 520 ± 9     | 38 ± 15  | 18 ± 4   | < 1.1 | < 0.60 | < 1.5    |
|  | 44 (1 m)  | < 0.22  | 87 ± 14  | < 0.0012  | 7.2 ± 16 | < 0.62   | 15 ± 53   | 210 ± 25    | 14 ± 41  | 14 ± 53  | < 1.1 | < 0.60 | < 1.5    |
|  | 44 (10 m) | < 0.22  | 210 ± 11 | 0.33 ± 63 | 14. ± 6  | < 0.62   | 29 ± 8    | 340 ± 8     | 40 ± 11  | 18 ± 4   | < 1.1 | < 0.60 | < 1.5    |
|  | 45 (1 m)  | < 0.22  | 100 ± 17 | < 0.0012  | 9.2 ± 12 | < 0.62   | 13 ± 6    | 270 ± 22    | 22 ± 1   | 11 ± 12  | < 1.1 | < 0.60 | < 1.5    |
|  | 45 (10 m) | 33 ± 14 | 320 ± 6  | 0.29 ± 54 | 24 ± 12  | 110 ± 5  | 39 ± 3    | 680 ± 2     | 54 ± 16  | 25 ± 2   | < 1.1 | < 0.60 | < 1.5    |
|  | 46 (10 m) | < 0.22  | 150 ± 3  | 0.24 ± 34 | 14 ± 6   | < 0.62   | 21 ± 11   | 970 ± 2     | 31 ± 1   | 13 ± 1   | < 1.1 | < 0.60 | < 1.5    |
|  | 47 (1 m)  | < 0.22  | 170 ± 21 | < 0.0012  | 14 ± 2   | < 0.62   | 21 ± 2    | 330 ± 1     | 31 ± 8   | 14 ± 12  | < 1.1 | < 0.60 | < 1.5    |
|  | 47 (10 m) | < 0.22  | 180 ± 8  | 0.20 ± 40 | 12 ± 34  | < 0.62   | 28 ± 7    | 310 ± 8     | 26 ± 23  | 16 ± 14  | < 1.1 | < 0.60 | < 1.5    |
|  | 48 (1 m)  | < 0.22  | 200 ± 2  | 0.22 ± 26 | 18 ± 12  | < 0.62   | 32 ± 8    | 660 ± 8     | 51 ± 19  | 21 ± 4   | < 1.1 | < 0.60 | < 1.5    |
|  | 49 (1 m)  | < 0.22  | 170 ± 5  | 0.58 ± 23 | 20 ± 1   | < 0.62   | 35 ± 17   | 760 ± 2     | 44 ± 5   | 24 ± 2   | < 1.1 | < 0.60 | 170 ± 19 |
|  | 49 (10 m) | < 0.22  | 130 ± 2  | 0.56 ± 18 | 20 ± 2   | < 0.62   | 25 ± 6    | 690 ± 9     | 46 ± 10  | 20 ± 13  | < 1.1 | < 0.60 | 190 ± 11 |
|  | 52 (1 m)  | < 0.22  | 430 ± 14 | 2.5 ± 1   | 32 ± 2   | 130 ± 18 | 81 ± 4    | 1,710 ± 9   | 96 ± 10  | 56 ± 3   | < 1.1 | < 0.60 | 290 ± 27 |
|  | 52 (10 m) | < 0.22  | 94 ± 27  | 0.55 ± 35 | 16 ± 4   | < 0.64   | 21 ± 6    | 770 ± 25    | 32 ± 3   | 17 ± 2   | < 1.1 | < 0.60 | < 1.5    |
|  | 53 (1 m)  | < 0.22  | 370 ± 14 | < 0.0012  | 30 ± 9   | 83 ± 6   | 54 ± 6    | 1,140 ± 13  | 73 ± 5   | 38 ± 6   | < 1.1 | < 0.60 | < 1.5    |
|  | 53 (10 m) | < 0.22  | 320 ± 3  | 0.43 ± 30 | 23 ± 5   | < 0.62   | 44 ± 5    | 1,000 ± 10  | 55 ± 6   | 58 ± 62  | < 1.1 | < 0.60 | < 1.5    |
|  | 57        | < 0.22  | 220 ± 67 | 0.32 ± 61 | 17 ± 64  | < 0.62   | 39 ± 64   | 830 ± 64    | 54 ± 55  | 27 ± 52  | < 1.1 | < 0.60 | < 1.5    |
|  | 58        | < 0.22  | 430 ± 2  | 0.62 ± 48 | 24 ± 12  | 85 ± 14  | 65 ± 1    | 1,260 ± 7   | 58 ± 1   | 110 ± 5  | < 1.1 | < 0.60 | 280 ± 16 |
|  | 59        | 24 ± 10 | 320 ± 22 | 0.44 ± 30 | 22 ± 11  | 73 ± 17  | 54 ± 25   | 1,210 ± 8   | 53 ± 5   | 31 ± 20  | < 1.1 | < 0.60 | < 1.50   |



**Table S6.** Limits of detection (DL, ppm) for collected samples for ICP-MS analyses

|    | <b>DL for 2019 samples</b> | <b>DL for 2018 samples</b> |
|----|----------------------------|----------------------------|
| As | 22                         | 6.5                        |
| Ba | 2.4                        | 71                         |
| Cd | 0.15                       | 0.0012                     |
| Co | 3.3                        | 1.3                        |
| Cr | 63                         | N/A                        |
| Cu | 5.7                        | 20                         |
| Mn | 5.4                        | 54                         |
| Ni | 9.5                        | 21                         |
| Pb | 2.3                        | 0.74                       |
| Sb | 110                        | 8.3                        |
| Se | 61                         | 6.4                        |
| Sn | 12                         | 2.9                        |
| Zn | 150                        | 84                         |

**Table S7.** Certified reference materials testing results for ICP-MS analyses

|    | Measured value of<br>71A (5 ppb) <sup>1</sup> | Measured value of<br>71A (10 ppb) | Measured value of<br>68A (5 ppb) <sup>2</sup> | Measured value of<br>68A (10 ppb) |
|----|-----------------------------------------------|-----------------------------------|-----------------------------------------------|-----------------------------------|
| As | 4.83                                          | 9.86                              | -                                             | -                                 |
| Ba | 4.88                                          | 9.82                              | -                                             | -                                 |
| Cd | 4.83                                          | 10.5                              | -                                             | -                                 |
| Co | 4.80                                          | 9.9                               | -                                             | -                                 |
| Cu | 4.79                                          | 9.91                              | -                                             | -                                 |
| Mn | 4.87                                          | 9.99                              | -                                             | -                                 |
| Ni | 4.80                                          | 9.87                              | -                                             | -                                 |
| Pb | 5.03                                          | 10.0                              | -                                             | -                                 |
| Sb | -                                             | -                                 | 5.10                                          | 10.1                              |
| Se | 4.63                                          | 9.38                              | -                                             | -                                 |
| Sn | -                                             | -                                 | 5.48                                          | 10.3                              |
| Zn | 4.83                                          | 9.94                              | -                                             | -                                 |

<sup>1</sup>**IV-ICP-MS-71A:** ICP-MS Complete standard containing the following elements in a HNO<sub>3</sub> matrix: As, Ba, Cd, Co, Cu, Mn, Ni, Pb, Se, Zn

<sup>2</sup>**ICP-MS-68A-B:** Multi-element solution standard (2% HNO<sub>3</sub>, 10 µg/mL). This standard is traceable to NIST SRM 3100 series. ISO 9001:2015 certified, ISO/IEC 17025:2017 and ISO 17034:2016 accredited: Sb, Sn
